# Supplementary material for: Pt nanoparticles on Ti3C2Tx-based MXenes as efficient catalysts for the selective hydrogenation of nitroaromatic compounds to amines
Source: Royal Society of Chemistry journal article supplement (doi:10.1039/d0dt02594a), 2020-01-01
Supplement: d0dt02594a1.pdf [file d0dt02594a1.pdf]

# **Pt nanoparticles on Ti<sub>3</sub>C<sub>2</sub>T<sub>x</sub>-based MXene as efficient catalysts for selective hydrogenation of nitroaromatic compounds to amines**

Qian Chen,<sup>a</sup> Weidong Jiang<sup>b</sup> and Guangyin Fan<sup>a,\*</sup>

<sup>a</sup> *College of Chemistry and Materials Science, Sichuan Normal University, Chengdu 610068, P.R. China.*

<sup>b</sup> *School of Chemistry and Environmental Engineering, Sichuan University of Science & Engineering, Zigong, Sichuan 643000, China.*

\*To whom correspondence should be addressed. Tel.: (+86) 28-84760802

Fax: (+86) 28 84767868

E-mail: fanguangyin@sicnu.edu.cn (G.Y Fan).

## Materials and Chemicals

Ti<sub>3</sub>AlC<sub>2</sub> powder was obtained from Beijing Hutong Wangyi Commerce & Trade Co., Ltd., China. Sodium borohydride (SB), Ammonia borane (AB), chloroplatinic acid (H<sub>2</sub>PtCl<sub>6</sub>), ethanol, and concentrated hydrofluoric acid (HF) aqueous solution was purchased from Aladdin, China. All reagents and chemicals were used as received without any purification.

## Characterization

Microstructure and particle size characterizations were measured by a transmission electron microscopy (TEM, JEM-2100F, JEOL). The crystal structure of the samples was observed by X-ray diffraction (XRD, Rigaku Co, Cu K $\alpha$ , Japan).. Fourier-Transformed-infrared (FT-IR, Thermo Nicolet, USA) spectroscopy were obtained on IRTracer-100 by using pressed KBr tables. The metal loadings of Pt/Ti<sub>3</sub>C<sub>2</sub>T<sub>x</sub>-D samples were determined by Inductively Coupled Plasma Optical Emission Spectrometer (ICP-OES, Optima 8000).

CO chemisorption (AutoChem II 2920, USA): The dispersion of Pt NPs was calculated on the base of CO chemisorption. Sample (0.1 g) was first pretreated in CO (100 cm<sup>3</sup>/min) at 150 °C for 1 h and purged with He gas (100 cm<sup>3</sup>/min) for 1 h. Afterward, the catalyst was cooled to room temperature and CO pluses were injected from a calibrated on-line sampling valve. CO adsorption showed the same peaks areas. A CO/Pt stoichiometry of 1 was used for calculations <sup>1</sup>.

XPS characterization: The tests were carried out by using a surface analysis system (Thermo ESCALAB 250, USA) employing monochromatic Al-K $\alpha$  radiation the surface

samples. Photoelectrons were obtained by an acceptance angle of  $90^\circ$  between the sample surface and the path to the analyzer. Charge neutralization was executed utilizing a co-axial, low-energy electrons and ions beams to avoid shifting in the recorded binding energy (BE). Survey spectra were performed at a pass energy of 100 eV with a step size of 1.0 eV. XPS spectra were collected for Ti 2p, O 1s, C 1s, F 1s and Pt 4f for the as-obtained samples at a pass energy of 20 eV, with a step size of 0.5 eV. The BE scales of all XPS spectra was referenced to the Fermi-edge ( $E_f$ ), which was set to a BE of 0 eV. The samples were compressed and attached to double-sided tape to acquire the spectra. All teats were operated without Ar ion sputtering. And then, the quantification, using the obtained core-level intensities, and peak fitting of the core-level spectra was performed through a software package (XPSPEAK 4.1). Prior to peak fitting the background contributions were subtracted using a Shirley function. The area ratios of Ti  $2p_{3/2}$  and  $2p_{1/2}$  peaks were constrained to 2:1; those of Pt  $4f_{5/2}$  and  $4f_{7/2}$  were constrained to 3:4.

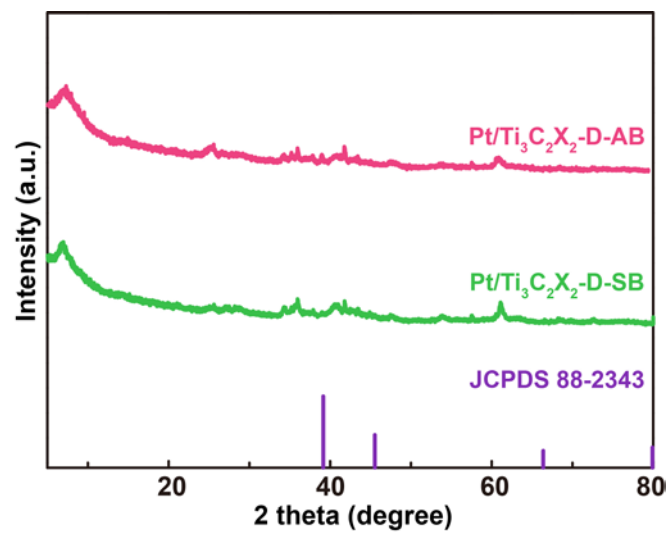

**Fig. S1** XRD patterns of Pt/Ti<sub>3</sub>C<sub>2</sub>T<sub>x</sub>-D-AB and Pt/Ti<sub>3</sub>C<sub>2</sub>T<sub>x</sub>-D-SB (Pt JCPDS 88-2343).

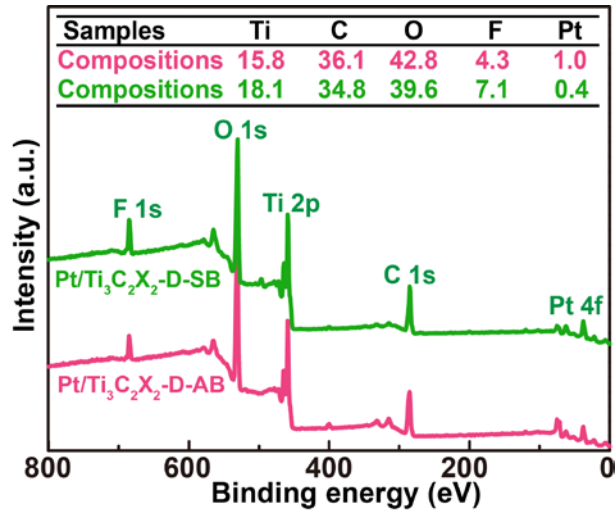

**Fig. S2** XPS full scan spectra of Pt/Ti<sub>3</sub>C<sub>2</sub>T<sub>x</sub>-D-AB and Pt/Ti<sub>3</sub>C<sub>2</sub>T<sub>x</sub>-D-SB (inset: the atomic ratio of the detected elements).

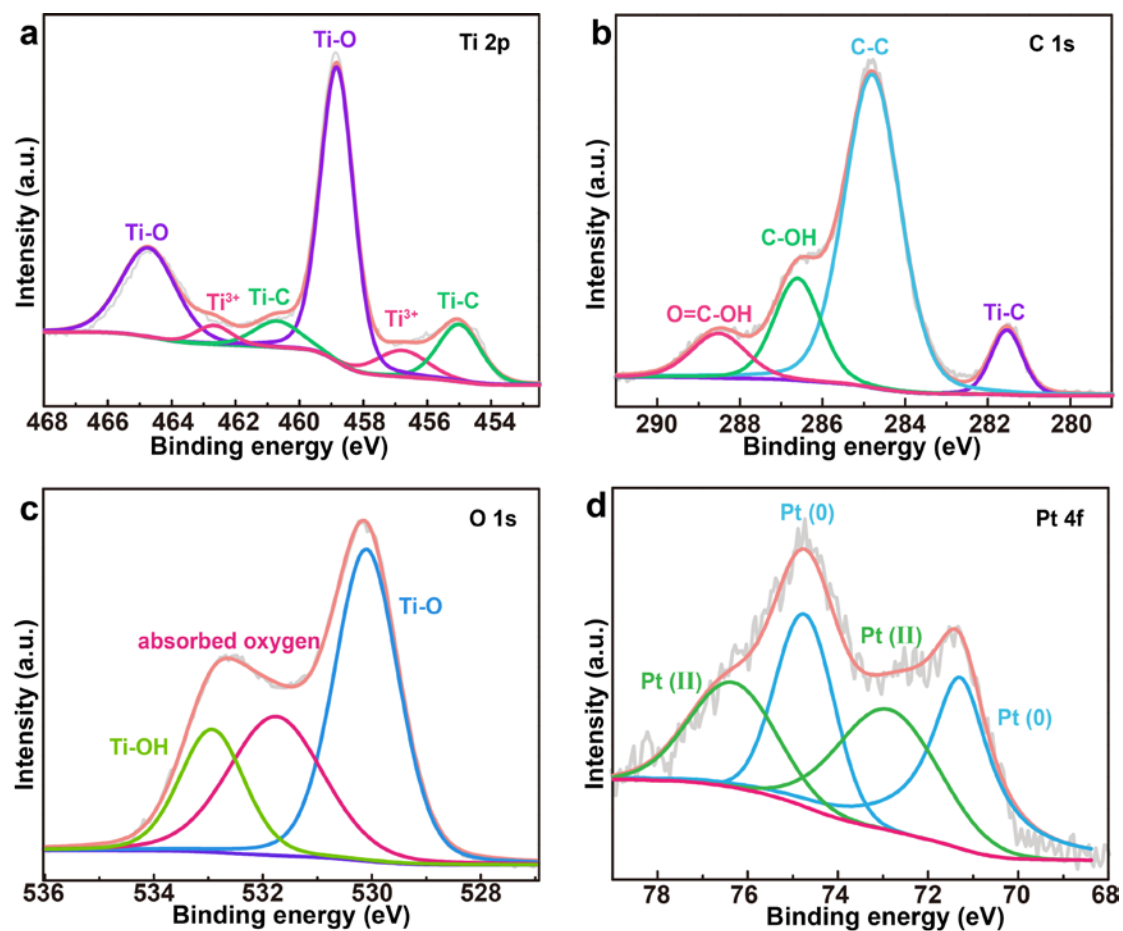

**Fig. S3** High resolution XPS spectrum of Ti 2p (a), C 1s (b), O 1s (c) and Pt 4f (d) for Pt/Ti<sub>3</sub>C<sub>2</sub>T<sub>x</sub>-SB, respectively.

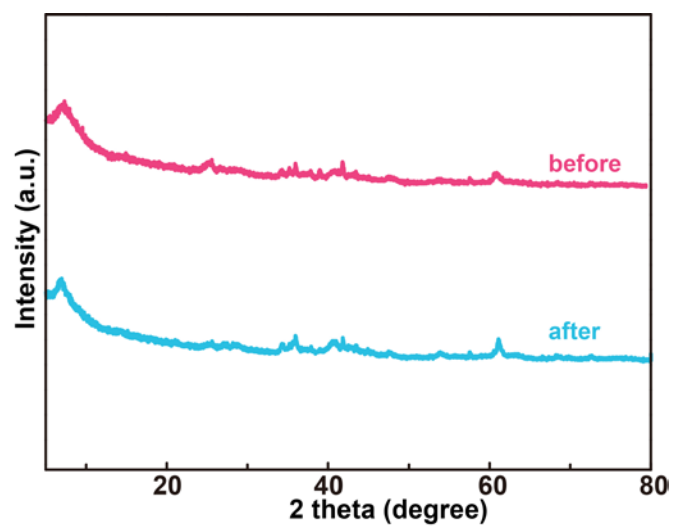

**Fig. S4** XRD patterns of Pt/Ti<sub>3</sub>C<sub>2</sub>T<sub>x</sub>-D-AB before and after the sixth run.

**Table S1.** The ratio of Pt (0) and Pt (II) for all samples by XPS

| Catalyst                                               | Pt (0) | Pt (II) |
|--------------------------------------------------------|--------|---------|
| Pt/Ti <sub>3</sub> C <sub>2</sub> T <sub>x</sub> -D-AB | 67.4%  | 32.6%   |
| Pt/Ti <sub>3</sub> C <sub>2</sub> T <sub>x</sub> -D-SB | 55.1%  | 44.9%   |



**Table S2.** Effect of reaction time on catalytic hydrogenation of *p*-CNB to *p*-CAN catalyzed by Pt/Ti<sub>3</sub>C<sub>2</sub>T<sub>x</sub>-AB.

| Reaction time<br>(min) | Conversion<br>(%) | Selectivity (%) |                |     |        |
|------------------------|-------------------|-----------------|----------------|-----|--------|
|                        |                   | <i>p</i> -CAN   | <i>p</i> -CNSB | AN  | others |
| 30                     | 79.0              | 91.2            | 7.7            | 0.6 | 0.5    |
| 50                     | 92.9              | 93.8            | 5.2            | 0.8 | 0.3    |
| 60                     | 100               | 99.5            | 0.4            | 0.1 | 0      |
| 90                     | 100               | 97.4            | 1.5            | 0.9 | 0.2    |
| 120                    | 100               | 97.6            | 1.2            | 1.0 | 0.2    |

Reaction conditions: catalyst, 5.0 mg; ethanol/water mixture with a volume percent of 28% (total volume: 7.0 mL); the amount of *p*-CNB, 1 mmol; the pressure of hydrogen: 1MPa; reaction temperature: 30 °C.

**Table S3.** Effect of temperature on catalytic hydrogenation of *p*-CNB to *p*-CAN catalyzed by Pt/Ti<sub>3</sub>C<sub>2</sub>T<sub>x</sub>-AB.

| Reaction temperature (°C) | Conversion (%) | Selectivity (%) |        |     |        |
|---------------------------|----------------|-----------------|--------|-----|--------|
|                           |                | p-CAN           | p-CNSB | AN  | others |
| 25                        | 70.3           | 89.9            | 9.0    | 0.5 | 0.6    |
| 30                        | 100            | 99.5            | 0.4    | 0.1 | 0      |
| 40                        | 100            | 97.8            | 1.3    | 1.6 | 0.2    |
| 50                        | 100            | 95.8            | 0.5    | 3.4 | 0.3    |

Reaction conditions: catalyst, 5.0 mg; ethanol/water mixture with a volume percent of 28% (total volume: 7.0 mL); the amount of *p*-CNB, 1 mmol; the pressure of hydrogen: 1MPa; reaction time: 1 h.

**Table S4.** Effect of hydrogen pressure on catalytic hydrogenation of *p*-CNB to *p*-CAN catalyzed by Pt/Ti<sub>3</sub>C<sub>2</sub>T<sub>x</sub>-AB.

| H <sub>2</sub> pressure <sup>c</sup><br>(MPa) | Conversion<br>(%) | Selectivity (%) |                |     |        |
|-----------------------------------------------|-------------------|-----------------|----------------|-----|--------|
|                                               |                   | <i>p</i> -CAN   | <i>p</i> -CNSB | AN  | others |
| 1.0                                           | 100               | 99.5            | 0.4            | 0.1 | 0      |
| 1.5                                           | 100               | 96.5            | 2.9            | 0.5 | 0.1    |
| 2.0                                           | 100               | 96.3            | 2.9            | 0.8 | 0.1    |
| 2.5                                           | 100               | 95.8            | 2.8            | 1.3 | 0.1    |

Reaction conditions: catalyst, 5.0 mg; ethanol/water mixture with a volume percent of 28%(total volume: 7.0 mL); the amount of *p*-CNB, 1 mmol; reaction time: 1 h; reaction temperature: 30 °C.

**Table S5.** The catalytic performance for different catalysts

| Catalysts                                              | Solvent    | P<br>(MPa) | T<br>(°C) | Time<br>(min) | Conv.<br>(%) | Sel.<br>(%) | Ref. |
|--------------------------------------------------------|------------|------------|-----------|---------------|--------------|-------------|------|
| Pt/Al <sub>2</sub> O <sub>3</sub> @NC-15               | EtOH       | 1          | 80        | 60            | 100          | 98.6        | 2    |
| Pt@Cu(0.23)/TiO <sub>2</sub>                           | EtOH       | 1          | 80        | 90            | 50.4         | 100         | 3    |
| PVP-Pt                                                 | MeOH       | 0.1        | 30        | 30            | 100          | 68.8        | 4    |
| Ru/CNT                                                 | MeOH       | 4          | 60        | 30            | 100          | 90.3        | 5    |
| Pt/CMK-3                                               | EtOH       | 4          | 25        | 5             | 100          | 56.8        | 6    |
| PtNi/CNTs                                              | EtOH       | 0.1        | 30        | 160           | 99.6         | 98.2        | 7    |
| Pt/ZrO <sub>2</sub>                                    | EtOH       | 0.1        | 30        | 210           | 99.4         | 90.9        | 8    |
| Pt-SA/C                                                | EtOH       | 1          | 40        | 60            | >99          | >99         | 9    |
| PtCeO <sub>x</sub> /CNTs                               | EtOH       | 0.1        | 30        | 67            | 99.4         | 98.1        | 10   |
| Pt–NiO@mSiO <sub>2</sub>                               | EtOH       | 1          | 45        | 120           | 87.9         | 95.3        | 11   |
| Ru5/NPC(NB)                                            | MeOH       | 1.5        | 140       | 150           | 98           | 98          | 12   |
| Pt/Ti <sub>3</sub> C <sub>2</sub> T <sub>x</sub> -D-AB | EtOH/water | 1          | 30        | 60            | 100          | 99.5        | This |
| Pt/Ti <sub>3</sub> C <sub>2</sub> T <sub>x</sub> -D-SB | EtOH/water | 1          | 30        | 60            | 40.4         | 84.3        | Work |

## Reference

1. R. Nie, D. Liang, L. Shen, J. Gao, P. Chen and Z. Hou, *Appl. Catal., B* 2012, **127**, 212-220.
2. D. Zhu, X. Weng, Y. Tang, J. Sun, S. Zheng and Z. Xu, *RSC Adv.*, 2020, **10**, 14208-14216.
3. D. Zhu, L. Long, J. Sun, H. Wan and S. Zheng, *Appl. Surf. Sci.*, 2020, **504**, 144329.
4. W. Tu, H. Liu and Y. Tang, *J Mol. Catal. A: Chem.*, 2000, **159**, 115-120.
5. C. Antonetti, M. Oubenali, A. M. Raspolli Galletti, P. Serp and G. Vannucci, *Appl. Catal., A* 2012, **421-422**, 99-107.
6. J. Li, X. Li, Y. Ding and P. Wu, *Chin. J. Catal.*, 2015, **36**, 1995-2003.
7. X. X. Han, Q. Chen and R. X. Zhou, *J. Mol. Catal. A: Chem.*, 2007, **277**, 210-214.
8. X. Han, R. Zhou, G. Lai and X. Zheng, *Catal. Today* 2004, **93-95**, 433-437.
9. X. Yan, P. Duan, F. Zhang, H. Li, H. Zhang, M. Zhao, X. Zhang, B. Xu, S. J. Pennycook and J. Guo, *Carbon*, 2019, **143**, 378-384.
10. X. X. Han, J. R. Li and R. X. Zhou, *Chin. Chem. Lett.*, 2009, **20**, 96-98.
11. H. Liu, H. Yu, C. Xiong and S. Zhou, *RSC Adv.*, 2015, **5**, 20238-20247.
12. X. Li, S. Zhao, W. Zhang, Y. Liu and R. Li, *Dalton Trans.*, 2016, **45**, 15595-15602.
